# Supplementary material
Source: publisher figshare collection journal article supplement (https://karger.figshare.com/ndownloader/files/14689721)

**Supplementary Fig. S2.** Representative INNO LiPA Mycobacteria v2 line probe assay (LiPA) patterns obtained with DNA extracted from mycobacterial growth indicator tube 960 system (MGIT) cultures identified as *M. tuberculosis*, (lanes MTB), *M. kansasii* (lane MKA), *M. avium* (lane MAV), *M. intracellulare* (lanes MIN), *M. fortuitum*, (lane MFO), *M. abscessus* (lane MAB), *M. chelonae* (lane MCH), *M. gordonae* (lane MGO), *M. lentiflavum* (lane MLE), *M. immunogenum* (lane MIM) and mixed culture containing *M. tuberculosis* and *M. fortuitum* (lane MTB + MFO). The pattern obtained from control (no DNA) is also shown (lane Blank). Arrows 1 and 2 mark the marker line and the conjugate control, respectively. Arrow 3 indicates probe 1 which reacts with all *Mycobacterium* species. Other probes (not marked) react with different *Mycobacterium* species/species complex isolates.


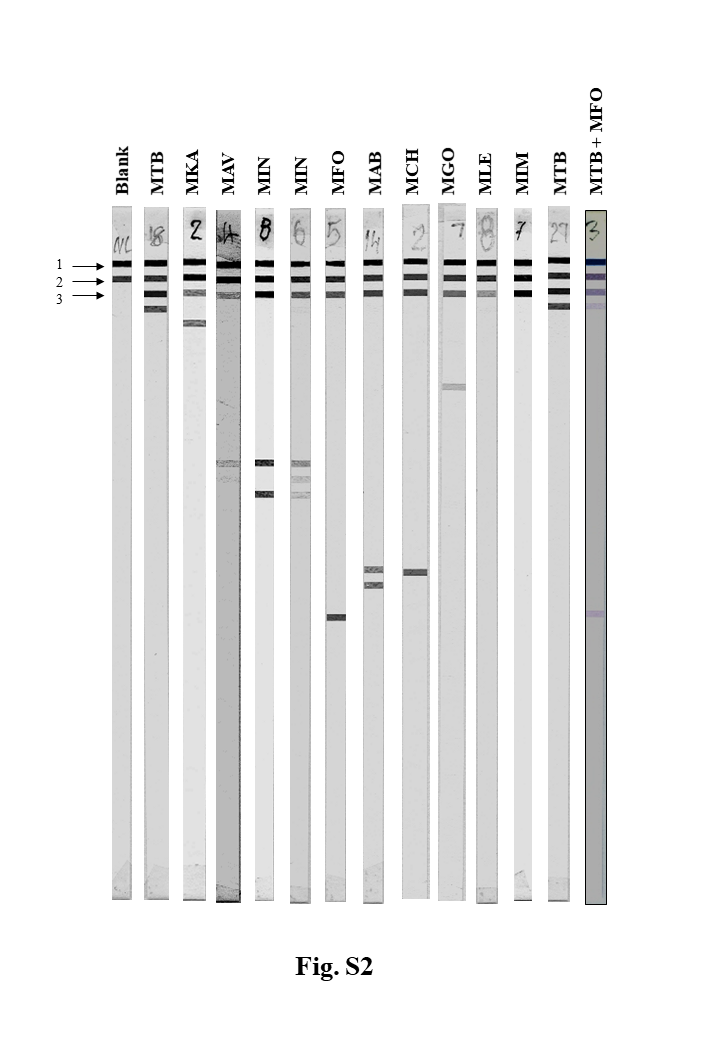

Supplement: Supplementary file 1 [file 14689721]
